# Supplementary material
Source: publisher figshare collection journal article supplement (https://sage.figshare.com/ndownloader/files/20319231)

## Supplementary figure

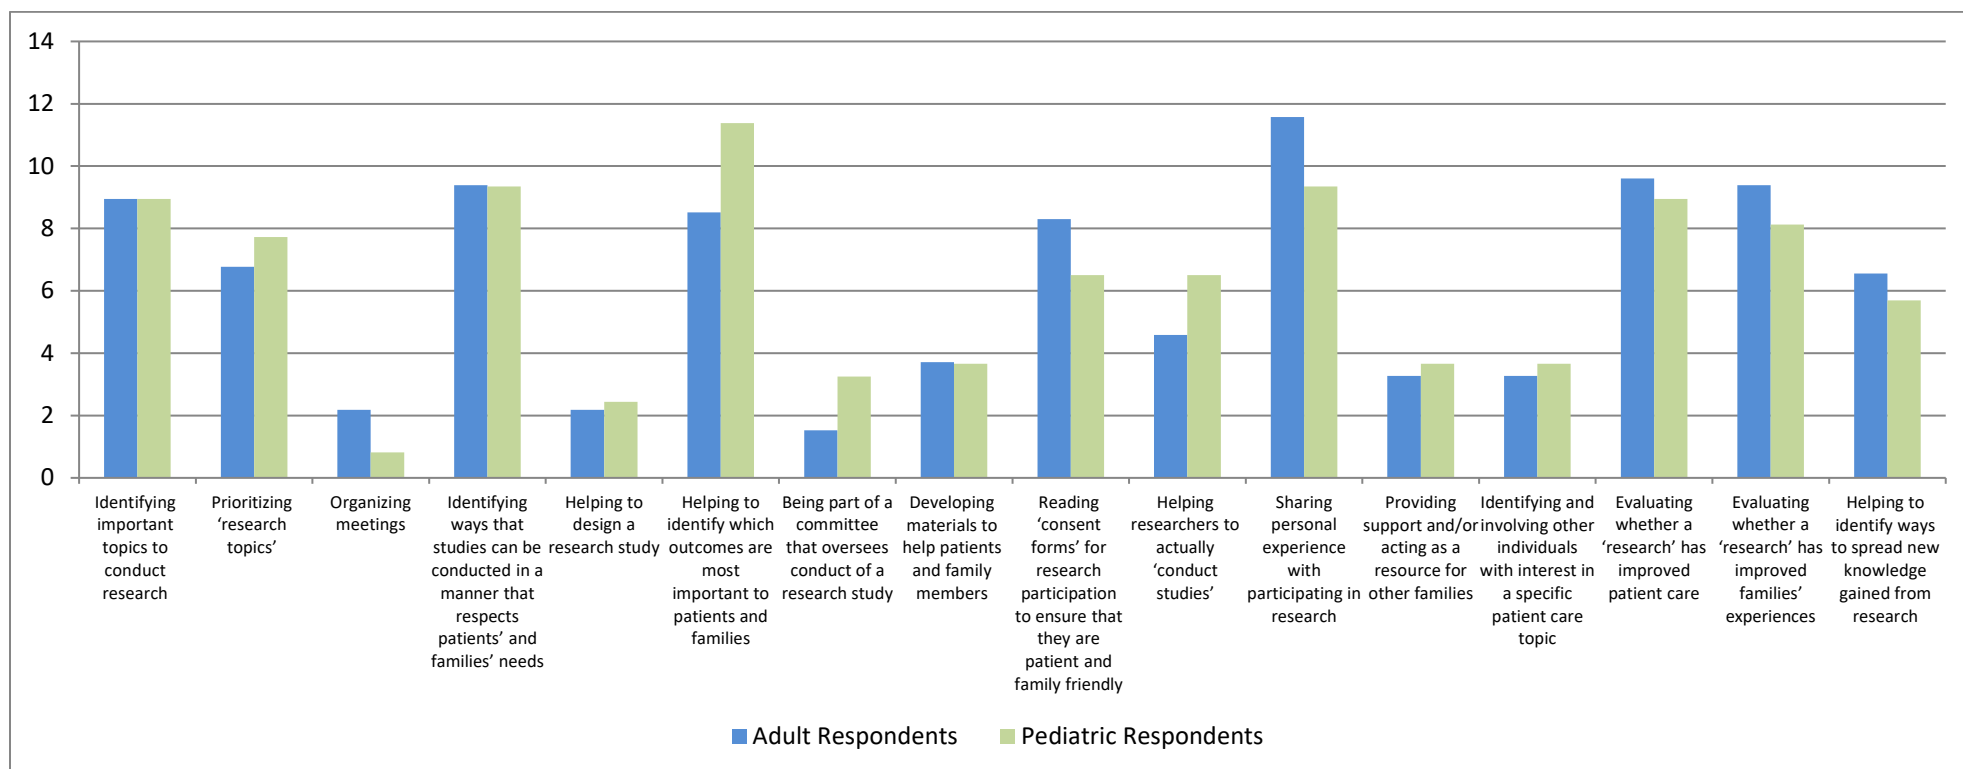

Supplement: Supplementary file 1 [file 20319231]
